# Supplementary material for: Interactive Effects of Serum Leptin Levels and Physical Comorbidity on the Pharmacotherapeutic Response of Depressive Disorders
Source: PubMed Central journal article supplement — Clin Psychopharmacol Neurosci. 2022 Nov 30;20(4):662–74. doi: 10.9758/cpn.2022.20.4.662 (PMC9606432; doi:10.9758/cpn.2022.20.4.662), 2022-11-30
Supplement: cpn-20-4-662-supple.pdf [file cpn-20-4-662-supple.pdf]

**Supplementary Table 1.** Baseline serum leptin levels by remission status according to initial antidepressant types

| Type of antidepressant                             | Up to 12-week treatment |                       |                          |                | Up to 12-month treatment |                       |                          |                |
|----------------------------------------------------|-------------------------|-----------------------|--------------------------|----------------|--------------------------|-----------------------|--------------------------|----------------|
|                                                    | Non-remission           | Remission             | Statistical coefficients | <i>p</i> value | Non-remission            | Remission             | Statistical coefficients | <i>p</i> value |
| SSRIs <sup>a</sup>                                 |                         |                       |                          |                |                          |                       |                          |                |
| Leptin, low:high                                   | 168 (47.1):189 (52.9)   | 190 (60.3):125 (39.7) | $\chi^2 = 11.818$        | 0.001          | 80 (51.9):74 (48.1)      | 221 (54.6):184 (45.4) | $\chi^2 = 0.308$         | 0.579          |
| NaSSA (mirtazapine)                                |                         |                       |                          |                |                          |                       |                          |                |
| Leptin, low:high                                   | 58 (39.7):88 (60.3)     | 59 (52.2):54 (47.8)   | $\chi^2 = 4.010$         | 0.045          | 28 (47.5):31 (52.5)      | 67 (44.7):83 (55.3)   | $\chi^2 = 0.133$         | 0.715          |
| SNRIs <sup>b</sup>                                 |                         |                       |                          |                |                          |                       |                          |                |
| Leptin, low:high                                   | 23 (40.4):34 (59.6)     | 21 (48.8):22 (51.2)   | $\chi^2 = 0.716$         | 0.397          | 16 (53.3):14 (46.7)      | 17 (36.2):30 (63.8)   | $\chi^2 = 2.203$         | 0.138          |
| NDRI (bupropion)                                   |                         |                       |                          |                |                          |                       |                          |                |
| Leptin, low:high                                   | 6 (37.5):10 (62.5)      | 5 (45.5):6 (54.5)     | $\chi^2 = 0.171$         | 0.679          | 1 (20.0):4 (80.0)        | 7 (53.8):6 (46.2)     | $\chi^2 = 1.675$         | 0.196          |
| Serotonin modulators and stimulator (vortioxetine) |                         |                       |                          |                |                          |                       |                          |                |
| Leptin, low:high                                   | 1 (20.0):4 (80.0)       | 2 (33.3):4 (66.7)     | $\chi^2 = 0.244$         | 0.621          | 2 (50.0):2 (50.0)        | 1 (20.0):4 (80.0)     | $\chi^2 = 0.900$         | 0.343          |

Values are presented as number (%).

SSRI, selective serotonin reuptake inhibitor; NaSSA, noradrenergic and specific serotonin antidepressant; SNRI, serotonin-norepinephrine reuptake inhibitor; NDRI, norepinephrine-dopamine reuptake inhibitor.

<sup>a</sup>Escitalopram, sertraline, paroxetine, and fluoxetine were included as SSRIs. <sup>b</sup>Venlafaxine, desvenlafaxine, and duloxetine were included as SNRIs.

**Supplementary Table 2.** Baseline serum leptin levels by remission status according to treatment steps

| Treatment step             | Up to 12-week treatment    |                        |                             |                | Up to 12-month treatment   |                        |                             |                |
|----------------------------|----------------------------|------------------------|-----------------------------|----------------|----------------------------|------------------------|-----------------------------|----------------|
|                            | Non-remission<br>(n = 596) | Remission<br>(n = 490) | Statistical<br>coefficients | <i>p</i> value | Non-remission<br>(n = 259) | Remission<br>(n = 625) | Statistical<br>coefficients | <i>p</i> value |
| Step 1<br>Leptin, low:high | 137 (47.1):154 (52.9)      | 88 (51.2):84 (48.8)    | $\chi^2 = 0.722$            | 0.396          | 53 (47.3):59 (52.7)        | 109 (50.9):105 (49.1)  | $\chi^2 = 0.384$            | 0.536          |
| Step 2<br>Leptin, low:high | 78 (42.4):106 (57.6)       | 112 (63.6):64 (36.4)   | $\chi^2 = 16.291$           | < 0.001        | 46 (55.4):37 (44.6)        | 112 (55.2):91 (44.8)   | $\chi^2 = 0.001$            | 0.969          |
| Step 3<br>Leptin, low:high | 39 (41.5):55 (58.5)        | 57 (53.8):49 (46.2)    | $\chi^2 = 3.012$            | 0.083          | 15 (46.9):17 (53.1)        | 69 (49.3):71 (50.7)    | $\chi^2 = 0.061$            | 0.806          |
| Step 4<br>Leptin, low:high | 11 (40.7):16 (59.3)        | 20 (55.6):16 (44.4)    | $\chi^2 = 1.355$            | 0.244          | 17 (53.1):15 (46.9)        | 25 (36.8):43 (63.2)    | $\chi^2 = 2.391$            | 0.122          |

Values are presented as number (%).

**Supplementary Table 3.** Baseline serum leptin levels by remission status according to treatment strategies

| Treatment strategy                  | Up to 12-week treatment    |                        |                             |         | Up to 12-month treatment   |                        |                             |         |
|-------------------------------------|----------------------------|------------------------|-----------------------------|---------|----------------------------|------------------------|-----------------------------|---------|
|                                     | Non-remission<br>(n = 596) | Remission<br>(n = 490) | Statistical<br>coefficients | p value | Non-remission<br>(n = 259) | Remission<br>(n = 625) | Statistical<br>coefficients | p value |
| Monotherapy                         |                            |                        |                             |         |                            |                        |                             |         |
| Leptin, low:high                    | 137 (47.1):154 (52.9)      | 88 (51.2):84 (48.8)    | $\chi^2 = 0.722$            | 0.396   | 53 (47.3):59 (52.7)        | 109 (50.9):105 (49.1)  | $\chi^2 = 0.384$            | 0.536   |
| Switch                              |                            |                        |                             |         |                            |                        |                             |         |
| Leptin, low:high                    | 19 (39.6):29 (60.4)        | 24 (57.1):18 (42.9)    | $\chi^2 = 2.768$            | 0.096   | 15 (53.6):13 (46.4)        | 24 (53.3):21 (46.7)    | $\chi^2 = 0.000$            | 0.984   |
| Combination                         |                            |                        |                             |         |                            |                        |                             |         |
| Leptin, low:high                    | 30 (47.6):33 (52.4)        | 39 (55.7):31 (44.3)    | $\chi^2 = 0.870$            | 0.351   | 17 (58.6):12 (41.4)        | 44 (53.0):39 (47.0)    | $\chi^2 = 0.273$            | 0.602   |
| Augmentation                        |                            |                        |                             |         |                            |                        |                             |         |
| Leptin, low:high                    | 39 (39.4):60 (60.6)        | 65 (69.1):29 (30.9)    | $\chi^2 = 17.180$           | < 0.001 | 21 (50.0):21 (50.0)        | 64 (57.1):48 (42.9)    | $\chi^2 = 0.630$            | 0.427   |
| Switch + Combination                |                            |                        |                             |         |                            |                        |                             |         |
| Leptin, low:high                    | 7 (50.0):7 (50.0)          | 10 (66.7):5 (33.3)     | $\chi^2 = 0.829$            | 0.362   | 5 (55.6):4 (44.4)          | 13 (54.2):11 (45.8)    | $\chi^2 = 0.005$            | 0.943   |
| Switch + Augmentation               |                            |                        |                             |         |                            |                        |                             |         |
| Leptin, low:high                    | 10 (38.5):16 (61.5)        | 16 (59.3):11 (40.7)    | $\chi^2 = 2.292$            | 0.130   | 4 (66.7):2 (33.3)          | 14 (45.2):17 (54.8)    | $\chi^2 = 0.931$            | 0.335   |
| Augmentation + Combination          |                            |                        |                             |         |                            |                        |                             |         |
| Leptin, low:high                    | 18 (39.1):28 (60.9)        | 32 (55.2):26 (44.8)    | $\chi^2 = 2.645$            | 0.104   | 7 (38.9):11 (61.1)         | 33 (45.2):40 (54.8)    | $\chi^2 = 0.234$            | 0.629   |
| Switch + Augmentation + Combination |                            |                        |                             |         |                            |                        |                             |         |
| Leptin, low:high                    | 5 (55.6):4 (44.4)          | 3 (25.0):9 (75.0)      | $\chi^2 = 2.036$            | 0.154   | 9 (60.0):6 (40.0)          | 14 (32.6):29 (67.4)    | $\chi^2 = 3.500$            | 0.061   |

Values are presented as number (%).

**Supplementary Table 4.** Baseline characteristics by BMI in patients with depressive disorders

| Variable                                             | Up to 12-week treatment (n = 1,085) |                     |                                          |                |
|------------------------------------------------------|-------------------------------------|---------------------|------------------------------------------|----------------|
|                                                      | BMI < 23<br>(n = 524)               | BMI 23<br>(n = 561) | Statistical<br>coefficients <sup>a</sup> | <i>p</i> value |
| Age (yr)                                             | 55.6 ± 15.7                         | 58.2 ± 14.0         | <i>t</i> = -2.874                        | 0.004          |
| Sex, female                                          | 375 (71.6)                          | 369 (65.8)          | $\chi^2$ = 4.214                         | 0.040          |
| Education (yr)                                       | 9.6 ± 4.7                           | 8.6 ± 4.8           | <i>t</i> = 3.579                         | < 0.001        |
| Marital status, unmarried                            | 165 (31.5)                          | 161 (28.7)          | $\chi^2$ = 1.003                         | 0.317          |
| Living alone                                         | 76 (14.5)                           | 91 (16.2)           | $\chi^2$ = 0.614                         | 0.433          |
| Religious observance                                 | 281 (53.6)                          | 326 (58.1)          | $\chi^2$ = 2.211                         | 0.137          |
| Unemployed status                                    | 148 (28.2)                          | 168 (29.9)          | $\chi^2$ = 0.380                         | 0.537          |
| Monthly income, < 2,000 USD                          | 299 (57.1)                          | 348 (62.0)          | $\chi^2$ = 2.781                         | 0.095          |
| Major depressive disorder                            | 444 (84.7)                          | 480 (85.6)          | $\chi^2$ = 0.147                         | 0.701          |
| Melancholic feature                                  | 82 (15.6)                           | 80 (14.3)           | $\chi^2$ = 0.411                         | 0.521          |
| Atypical feature                                     | 37 (7.1)                            | 32 (5.7)            | $\chi^2$ = 0.838                         | 0.360          |
| Age at onset (yr)                                    | 51.0 ± 17.3                         | 52.7 ± 16.1         | <i>t</i> = -1.707                        | 0.088          |
| Duration of illness (yr)                             | 4.6 ± 8.3                           | 5.5 ± 9.6           | <i>t</i> = -1.589                        | 0.112          |
| Recurrent depression                                 | 273 (52.1)                          | 296 (52.8)          | $\chi^2$ = 0.048                         | 0.827          |
| Number of depressive episodes                        | 1.1 ± 1.5                           | 1.1 ± 1.5           | <i>t</i> = -0.622                        | 0.534          |
| Duration of present episode (mo)                     | 7.2 ± 10.1                          | 7.6 ± 10.7          | <i>t</i> = -0.652                        | 0.514          |
| Family history of depression                         | 82 (15.6)                           | 76 (13.5)           | $\chi^2$ = 0.962                         | 0.327          |
| History of suicide attempt                           | 44 (8.4)                            | 51 (9.1)            | $\chi^2$ = 0.163                         | 0.686          |
| Hamilton Depression Rating Scale                     | 21.1 ± 4.3                          | 20.5 ± 4.0          | <i>t</i> = 2.341                         | 0.019          |
| Hospital Anxiety & Depression Scale-anxiety subscale | 12.0 ± 4.0                          | 11.6 ± 4.1          | <i>t</i> = 1.923                         | 0.055          |
| EuroQol-5D                                           | 9.0 ± 1.5                           | 8.9 ± 1.5           | <i>t</i> = 1.448                         | 0.148          |
| Social and Occupational Functional Assessment Scale  | 55.9 ± 7.5                          | 56.0 ± 7.5          | <i>t</i> = -0.347                        | 0.729          |

Values are presented as mean ± standard deviation or number (%).

BMI, body mass index.

<sup>a</sup>Independent two sample *t* test or  $\chi^2$  test, as appropriate.

**Supplementary Table 5.** Baseline BMI by 12-week and 12-month remission status

| Exposure variable        | Up to 12-week treatment (n = 1,085) |                        |                                          |                | Up to 12-month treatment (n = 883) |                        |                                          |                |
|--------------------------|-------------------------------------|------------------------|------------------------------------------|----------------|------------------------------------|------------------------|------------------------------------------|----------------|
|                          | Non-remission<br>(n = 595)          | Remission<br>(n = 490) | Statistical<br>coefficients <sup>a</sup> | <i>p</i> value | Non-remission<br>(n = 258)         | Remission<br>(n = 625) | Statistical<br>coefficients <sup>a</sup> | <i>p</i> value |
| BMI (kg/m <sup>2</sup> ) |                                     |                        |                                          |                |                                    |                        |                                          |                |
| Median (IQR)             | 23.1 (4.3)                          | 23.1 (4.0)             | <i>U</i> = 145,127.5                     | 0.900          | 22.80 (4.0)                        | 23.4 (4.2)             | <i>U</i> = 72,731.0                      | 0.022          |
| < 23: ≥ 23, n (%)        | 287 (48.2):308 (51.8)               | 237 (48.4):253 (51.6)  | $\chi^2$ = 0.002                         | 0.965          | 135 (52.3):123 (47.7)              | 283 (45.3):342 (54.7)  | $\chi^2$ = 3.636                         | 0.057          |

BMI, body mass index; IQR, interquartile range.

<sup>a</sup>Mann–Whitney *U* test or  $\chi^2$  test, as appropriate.

**Supplementary Table 6.** Multivariate analysis examining the individual and interactive effects of baseline BMI and the number of physical disorders on the 12-week and 12-month remission

| Exposure variable                                   | 12-week remission   |                     | 12-month remission  |                     |
|-----------------------------------------------------|---------------------|---------------------|---------------------|---------------------|
|                                                     | Individual effect   | Interactive effect  | Individual effect   | Interactive effect  |
| BMI ( $\geq 23$ vs. $< 23$ )                        | 0.961 (0.753–1.227) | 0.695 (0.324–1.488) | 1.312 (0.978–1.029) | 1.226 (0.487–3.084) |
| Number of physical disorders ( $\geq 2$ vs. $< 2$ ) | 1.151 (0.888–1.493) | 0.902 (0.417–1.952) | 1.011 (0.738–1.385) | 0.974 (0.385–2.462) |
| Leptin $\times$ number of physical disorders        |                     | 0.801 (0.494–1.299) |                     | 0.953 (0.530–1.713) |

BMI, body mass index; HAMD, Hamilton Depression Rating Scale.

All data were adjusted for age, sex, education, and HAMD.

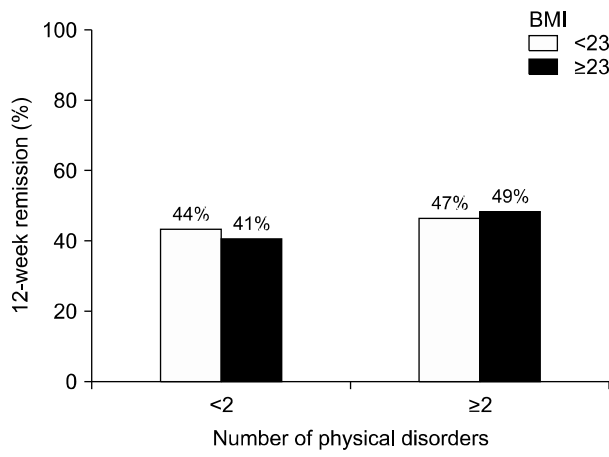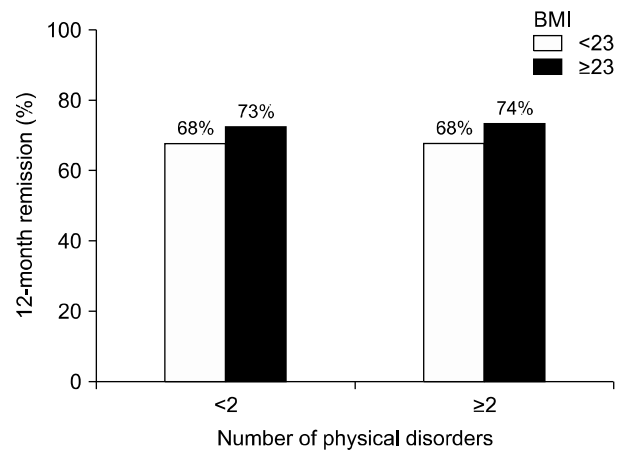

**Supplementary Fig. 1.** Rates of remission according to baseline BMI and the number of physical disorders. BMI, body mass index.
